# Supplementary material
Source: PubMed Central journal article supplement (PMC4208677)
Supplement: NIHMS93020-supplement-1_si_001.pdf [file NIHMS93020-supplement-1_si_001.pdf]

## Supporting Information

**Figure S1.** (A) Representative SEM image of BH. (B) Histogram summarizing the length distribution of over 150 BH particles. The mean length was determined as  $0.9 \pm 0.3 \mu\text{M}$ .

**Figure S2.** Latex bead phagocytosis. LPS ( $0.1 \mu\text{g}/\text{mL}$ )-stimulated RAW 264.7 cells were treated with serum-opsonized fluorescent red latex beads for (A) 6 h or (B) 24 h and analyzed by flow cytometry. Untreated control cell populations (tinted blue) were overlaid with the latex bead treated cell population (tinted orange) to demonstrate the increase in fluorescence upon phagocytosis.

**Figure S3.** BH phagocytosis. LPS ( $0.1 \mu\text{g}/\text{mL}$ )-stimulated RAW 264.7 cells were (A) untreated or treated with  $0.1 \text{ mg}/\text{mL}$  serum-opsonized BH for (B) 6 h or (C) 24 h and analyzed by flow cytometry. Consistent with phagocytosis of the Hz, density plots demonstrate that BH treatment markedly increased the side scatter of the total population at both time points.

**Figure S4.** Effect of HNE on cell death. LPS ( $0.1 \mu\text{g}/\text{mL}$ )-stimulated RAW 264.7 cells were (A) untreated or (B) treated with  $35 \mu\text{M}$  HNE for 24 h, and stained with apoptosis- and necrosis-specific stains. Three populations were observed by flow cytometric analysis: viable cells, apoptotic cells, and necrotic cells. Viable cells are negative for both Alexa Fluor 488 conjugated annexin V and PI, apoptotic cells are positive for Alexa Fluor 488 conjugated annexin V, and necrotic cells are positive for PI alone or both Alexa Fluor 488 conjugated annexin V and PI. HNE ( $35 \mu\text{M}$ ) only altered the percentage of apoptotic cells by 3.4% relative to stimulated cells, and the population of necrotic cells was unchanged regardless of HNE treatment, demonstrating that 24 h incubation of  $35 \mu\text{M}$  HNE is well tolerated by RAW 264.7 cells.

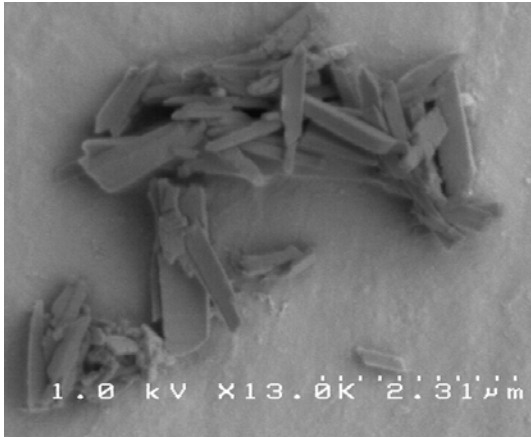

**Figure S1(a)**

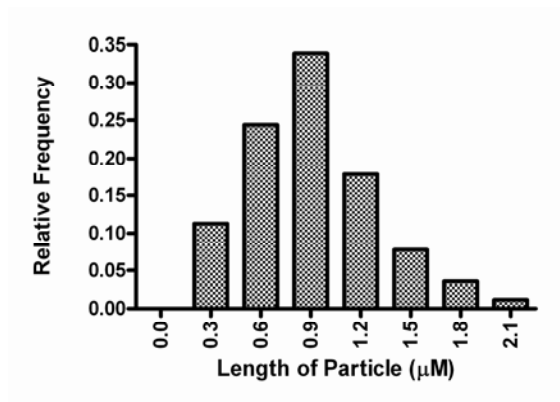

**Figure S1(b)**

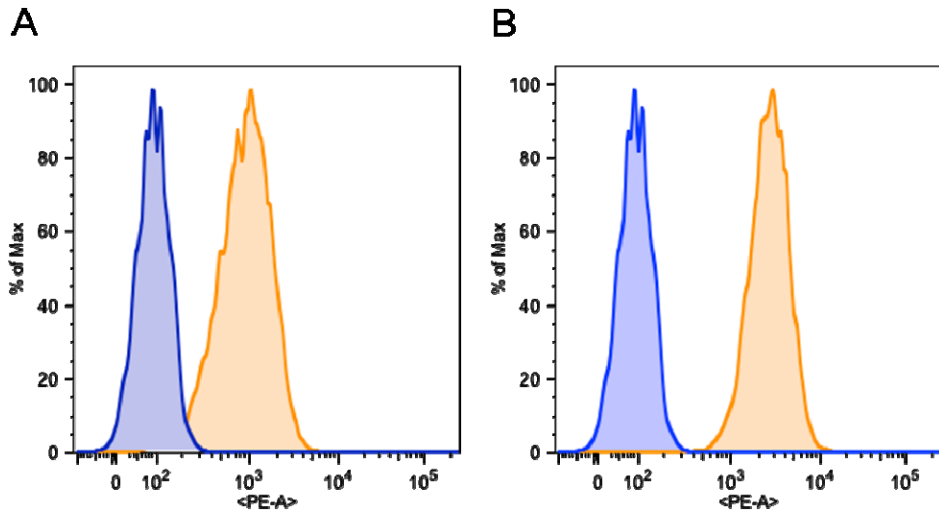

Figure S2.

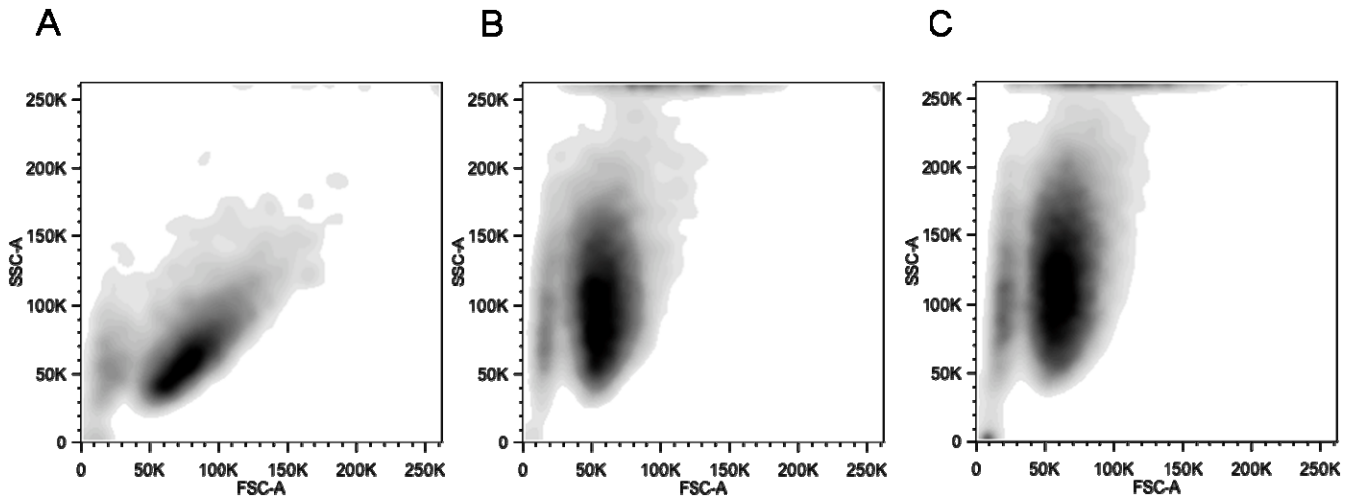

Figure S3

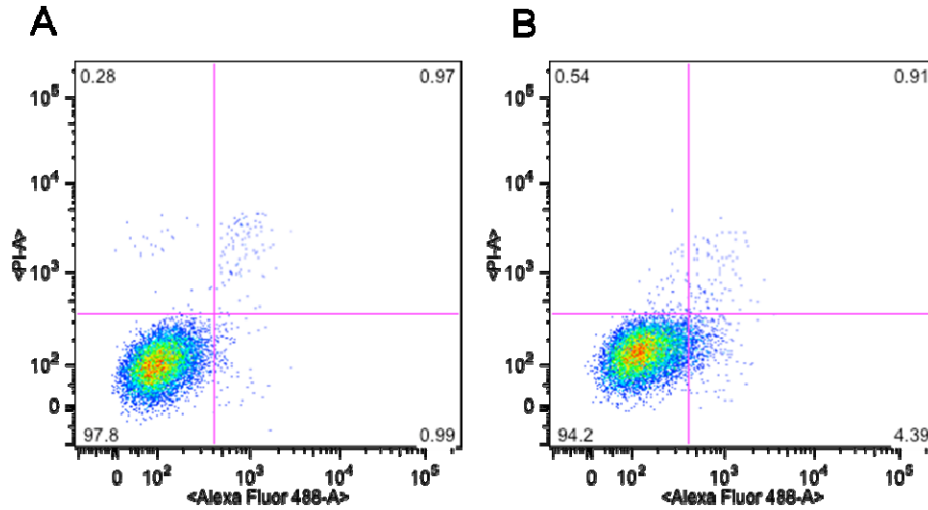

**Figure S4**

Supporting Information Table 1. Selected Genes Up-Regulated by 35  $\mu\text{M}$  HNE at 6 h<sup>a</sup>

|                           | gene symbol | description                                                | fold change | Affymetrix probeset ID | MGI gene ID | ref |
|---------------------------|-------------|------------------------------------------------------------|-------------|------------------------|-------------|-----|
| apoptosis (33, 34)        | Dap         | death-associated protein                                   | 1.8         | 10423498               | 1918190     |     |
|                           | Dnase2a     | deoxyribonuclease II $\alpha$                              | 1.8         | 10573461               | 1329019     |     |
|                           | Sgpl1       | sphingosine phosphate lyase 1                              | 1.8         | 10369413               | 1261415     |     |
| cell cycle (33)           | Plk2        | polo-like kinase 2 (Drosophila)                            | 3.7         | 10407126               | 1099790     |     |
|                           | Pdcd4       | programmed cell death 4                                    | 3.6         | 10463997               | 107490      |     |
|                           | Trp53inp1   | transformation related protein 53 inducible nuclear pr     | 3.4         | 10503259               | 1926609     |     |
|                           | Plekho1     | pleckstrin homology domain containing, family O member 1   | 2.3         | 10500295               | 1914470     |     |
|                           | Ccng1       | cyclin G1                                                  | 2.2         | 10385271               | 102890      |     |
|                           | Riok3       | RIO kinase 3                                               | 1.9         | 10453900               | 1914128     |     |
|                           | Nek3        | NIMA (never in mitosis gene a)-related expressed kinase 3  | 1.8         | 10577492               | 1344371     |     |
| cell-cell signaling (34)  | Trpv4       | transient receptor potential cation channel, subfamily V,  | 2.0         | 10532839               | 1926945     |     |
| defense response (33, 34) | Cldn11      | claudin 11                                                 | 1.8         | 10491313               | 106925      |     |
|                           | Als2        | amyotrophic lateral sclerosis 2 (juvenile) homolog (human) | 2.0         | 10354979               | 1921268     |     |
|                           | Nlrp10      | NLR family, pyrin domain containing 10                     | 1.9         | 10566709               | 2444084     |     |
| immune response (33, 34)  | Procr       | protein C receptor, endothelial                            | 4.3         | 10477717               | 104596      |     |

|                                      |           |                                                               |     |          |         |      |
|--------------------------------------|-----------|---------------------------------------------------------------|-----|----------|---------|------|
|                                      | Sqstm1    | sequestosome 1                                                | 3.2 | 10385572 | 107931  |      |
|                                      | Il7r      | interleukin 7 receptor                                        | 3.1 | 10427628 | 96562   |      |
|                                      | Tnfrsf10b | tumor necrosis factor receptor superfamily, member 10b        | 2.4 | 10416230 | 1341090 |      |
|                                      | Pglyrp3   | peptidoglycan recognition protein 3                           | 2.1 | 10493842 | 2685266 |      |
|                                      | Cd300lb   | CD300 antigen like family member B                            | 2.0 | 10392796 | 2685099 |      |
|                                      | Clec4d    | C-type lectin domain family 4, member d                       | 1.9 | 10541614 | 1298389 |      |
|                                      | Cd300a    | CD300A antigen                                                | 1.9 | 10382438 | 2443411 |      |
|                                      | Inpp1l    | inositol polyphosphate phosphatase-like 1                     | 1.9 | 10565996 | 1333787 |      |
|                                      | Icam1     | intercellular adhesion molecule 1                             | 1.8 | 10583519 | 96392   |      |
| inflammatory response (33, 34)       | Pla2g7    | phospholipase A2, group VII (platelet-activating factor a     | 3.2 | 10445293 | 1351327 |      |
|                                      | Lipa      | lysosomal acid lipase A                                       | 2.9 | 10467139 | 96789   |      |
|                                      | Ly96      | lymphocyte antigen 96                                         | 2.3 | 10344966 | 1341909 | (30) |
|                                      | Nlr4      | NLR family, CARD domain containing 4                          | 2.3 | 10452879 | 3036243 |      |
| intracellular protein transport (34) | Zmat3     | zinc finger matrin type 3                                     | 2.6 | 10497673 | 1195270 |      |
|                                      | Chml      | choroideremia-like                                            | 2.0 | 10360460 | 101913  |      |
|                                      | Napb      | N-ethylmaleimide sensitive fusion protein attachment protei   | 1.9 | 10488387 | 104562  |      |
| metabolic process (33)               | Blvrb     | biliverdin reductase B (flavin reductase (NADPH))             | 3.6 | 10551347 | 2385271 | (30) |
|                                      | Htatip2   | HIV-1 tat interactive protein 2, homolog (human)              | 3.0 | 10553403 | 1859271 |      |
|                                      | Hbp1      | high mobility group box transcription factor 1                | 2.9 | 10399897 | 894659  |      |
|                                      | Camk1d    | calcium                                                       | 2.6 | 10479852 | 2442190 |      |
|                                      | Pgd       | phosphogluconate dehydrogenase                                | 2.4 | 10518570 | 97553   | (30) |
|                                      | Mocos     | molybdenum cofactor sulfurase                                 | 2.4 | 10454353 | 1915841 |      |
|                                      | Alox5ap   | arachidonate 5-lipoxygenase activating protein                | 2.3 | 10527638 | 107505  | (30) |
|                                      | Crot      | carnitine O-octanoyltransferase                               | 2.3 | 10528102 | 1921364 |      |
|                                      | Pik3cb    | phosphatidylinositol 3-kinase, catalytic, $\beta$ polypeptide | 2.3 | 10595924 | 1922019 |      |
|                                      | Lpin1     | lipin 1                                                       | 2.2 | 10399478 | 1891340 |      |
|                                      | Gsr       | glutathione reductase                                         | 2.1 | 10571274 | 95804   |      |
|                                      | Mtmr10    | myotubularin related protein 10                               | 2.1 | 10553897 | 2142292 |      |
|                                      | Ulk1      | Unc-51 like kinase 1 (C.                                      | 2.1 | 10532472 | 1270126 |      |

|                                                          |          |                                                                      |            |                      |         |      |
|----------------------------------------------------------|----------|----------------------------------------------------------------------|------------|----------------------|---------|------|
|                                                          |          | elegans)                                                             |            |                      |         |      |
|                                                          | Calr3    | calreticulin 3                                                       | 2.0        | 10579691             | 1920566 |      |
|                                                          | Atp6v1a  | ATPase, H <sup>+</sup> transporting,<br>lysosomal V1 subunit A       | 1.9        | 10439566             | 1201780 |      |
|                                                          | Aldh6a1  | aldehyde dehydrogenase<br>family 6, subfamily A1                     | 1.9        | 10401473             | 1915077 |      |
|                                                          | Ephx1    | epoxide hydrolase 1,<br>microsomal                                   | 1.9        | 10360684             | 95405   |      |
|                                                          | Pgm211   | phosphoglucomutase 2-<br>like 1                                      | 1.9        | 10555303             | 1918224 |      |
|                                                          | Adi1     | acireductone dioxygenase<br>1                                        | 1.9        | 10395058             | 2144929 |      |
|                                                          | Pcyox1   | prenylcysteine oxidase 1                                             | 1.9        | 10545910             | 1914131 |      |
|                                                          | Hsd17b11 | hydroxysteroid (17- $\beta$ )<br>dehydrogenase 11                    | 1.8        | 10531919             | 2149821 |      |
| protein folding<br>(34)                                  | Rpp38    | ribonuclease P                                                       | 1.8        | 10479749             | 2443607 |      |
|                                                          | Dnajb4   | DnaJ (Hsp40) homolog,<br>subfamily B, member 4                       | 4.9        | 10502823             | 1914285 |      |
|                                                          | Fkbp1    | FK506 binding protein-<br>like                                       | 2.0        | 10444436             | 1932127 |      |
| regulation of<br>apoptosis (34)                          | Fkbp14   | FK506 binding protein 14                                             | 1.8        | 10544885             | 2387639 |      |
|                                                          | Serpib9  | serine (or cysteine)<br>peptidase inhibitor, clade<br>B, memb        | 2.5        | 10404429             | 106603  |      |
|                                                          | Bid      | BH3 interacting domain<br>death agonist                              | 2.2        | 10547531             | 108093  |      |
|                                                          | Bcl2l11  | BCL2-like 11 (apoptosis<br>facilitator)                              | 2.0        | 10475866             | 1197519 |      |
| regulation of<br>transcription,<br>DNA-dependent<br>(34) | Zbtb20   | zinc finger and BTB<br>domain containing 20                          | <b>3.6</b> | 10435789<br>10435769 | 1929213 |      |
|                                                          | Creg1    | cellular repressor of E1A-<br>stimulated genes 1                     | 3.5        | 10351347             | 1344382 | (30) |
|                                                          | Nr1d2    | nuclear receptor<br>subfamily 1, group D,<br>member 2                | 3.2        | 10417734             | 2449205 |      |
|                                                          | Bhlhb3   | basic helix-loop-helix<br>domain containing, class<br>B3             | 3.1        | 10549276             | 1930704 |      |
|                                                          | Eid3     | EP300 interacting<br>inhibitor of differentiation<br>3               | 2.8        | 10365286             | 1913591 |      |
|                                                          | Phf21a   | PHD finger protein 21A                                               | 2.4        | 10474006             | 2384756 |      |
|                                                          | Zscan29  | zinc finger SCAN<br>domains 29                                       | 2.4        | 10486712             | 2139317 |      |
|                                                          | Myst1    | MYST histone<br>acetyltransferase 1                                  | 2.1        | 10557831             | 1915023 |      |
|                                                          | Nfic     | nuclear factor I                                                     | 1.9        | 10371176             | 109591  |      |
|                                                          | Maf1     | MAF1 homolog (S.<br>cerevisiae)                                      | 1.9        | 10424833             | 1916127 |      |
|                                                          | Mafg     | v-maf<br>musculoaponeurotic<br>fibrosarcoma oncogene<br>family, prot | 1.9        | 10393881             | 96911   |      |
|                                                          | Mapk14   | mitogen-activated protein                                            | 1.8        | 10443391             | 1346865 | (30) |

|                          |                                                            |                                                          |            |                      |          |          |
|--------------------------|------------------------------------------------------------|----------------------------------------------------------|------------|----------------------|----------|----------|
|                          |                                                            | kinase 14                                                |            |                      |          |          |
|                          | Cep290                                                     | centrosomal protein 290                                  | 1.8        | 10366073             | 2384917  |          |
|                          | Snapc5                                                     | small nuclear RNA activating complex, polypeptide 5      | 1.8        | 10586176             | 1914282  |          |
|                          | Rxra                                                       | retinoid X receptor $\alpha$                             | 1.8        | 10470446             | 98214    |          |
|                          | Bbx                                                        | bobby sox homolog (Drosophila)                           | 1.8        | 10439854             | 1917758  |          |
| response to stress (34)  | Srxn1                                                      | sulfiredoxin 1 homolog (S. cerevisiae)                   | 10.3       | 10477061             | 104971   |          |
|                          | Gclm                                                       | glutamate-cysteine ligase, modifier subunit              | 7.4        | 10495763             | 104995   |          |
|                          | Gsta1                                                      | glutathione S-transferase, $\alpha$ 1 (Ya)               | <b>6.8</b> | 10587323<br>10587331 | 1095417  |          |
|                          | Hmox1                                                      | heme oxygenase (decycling) 1                             | 6.0        | 10572897             | 96163    | (30, 31) |
|                          | Dnajb4                                                     | DnaJ (Hsp40) homolog, subfamily B, member 4              | 5.3        | 10502823             | 1914285  |          |
|                          | Adrb2                                                      | adrenergic receptor, $\beta$ 2                           | 3.9        | 10459288             | 87938    |          |
|                          | Prdx1                                                      | peroxiredoxin 1                                          | <b>3.1</b> | 10507328<br>10436048 | 99523    | (32)     |
|                          | Idh1                                                       | isocitrate dehydrogenase 1 (NADP+), soluble              | 3.1        | 10355214             | 96413    |          |
|                          | Hspa1b                                                     | heat shock protein 1B                                    | 2.6        | 10450367             | 99517    |          |
|                          | Hspa4l                                                     | heat shock protein 4 like                                | 2.1        | 10491780             | 107422   |          |
|                          | Txnrd1                                                     | thioredoxin reductase 1                                  | 2.1        | 10365260             | 1354175  |          |
|                          | Hsph1                                                      | heat shock 105kDa/110kDa protein 1                       | 2.1        | 10535904             | 10535904 | (30)     |
|                          | G6pdx                                                      | glucose-6-phosphate dehydrogenase X-linked               | 2.0        | 10605338             | 105979   |          |
|                          | Apex1                                                      | apurinic                                                 | 1.8        | 10414522             | 88042    |          |
| Ahsa2                    | AHA1, activator of heat shock protein ATPase homolog 2 (ye | 1.8                                                      | 10384672   | 1916133              |          |          |
| signal transduction (33) | Kitl                                                       | kit ligand                                               | 3.9        | 10366052             | 96974    |          |
|                          | Rasgrp3                                                    | RAS, guanyl releasing protein 3                          | 3.7        | 10446965             | 3028579  |          |
|                          | Cebpa                                                      | CCAAT                                                    | 3.4        | 10552140             | 99480    |          |
|                          | Olfir26                                                    | olfactory receptor 26                                    | 3.4        | 10584470             | 109309   |          |
|                          | Nrp1                                                       | neuropilin 1                                             | 3.0        | 10576639             | 106206   |          |
|                          | Plekhm1                                                    | pleckstrin homology domain containing, family M (with RU | 3.0        | 10391918             | 2443207  |          |
|                          | Cxcr4                                                      | chemokine (C-X-C motif) receptor 4                       | 2.8        | 10357472             | 109563   |          |
|                          | Ralgps1                                                    | Ral GEF with PH domain and SH3 binding motif 1           | 2.7        | 10481804             | 1922008  |          |
|                          | Olfir933                                                   | olfactory receptor 933                                   | 2.5        | 10584479             | 3030767  |          |
|                          | Rasgef1b                                                   | RasGEF domain family, member 1B                          | 2.5        | 10531610             | 2443755  |          |
|                          | Nkiras1                                                    | NFKB inhibitor interacting Ras-like protein 1            | 2.5        | 10412900             | 1916971  |          |
|                          | Arhgap22                                                   | Rho GTPase activating                                    | 2.4        | 10413951             | 2443418  |          |

|                                                              |          |                                                                       |     |          |         |      |
|--------------------------------------------------------------|----------|-----------------------------------------------------------------------|-----|----------|---------|------|
|                                                              | Spa17    | protein 22<br>sperm autoantigenic<br>protein 17                       | 2.2 | 10592336 | 1333778 |      |
|                                                              | Bcl6     | B-cell leukemia                                                       | 2.2 | 10438738 | 107187  | (30) |
|                                                              | Raf1     | v-raf-leukemia viral<br>oncogene 1                                    | 2.2 | 10547034 | 97847   |      |
|                                                              | Tgfr1    | transforming growth<br>factor, $\beta$ receptor I                     | 2.1 | 10504817 | 98728   | (30) |
|                                                              | Rit1     | Ras-like without CAAX 1                                               | 2.1 | 10493309 | 108053  |      |
|                                                              | Calcoco1 | calcium binding and<br>coiled coil domain 1                           | 2.1 | 10433057 | 1914738 |      |
|                                                              | Arhgap27 | Rho GTPase activating<br>protein 27                                   | 2.0 | 10391895 | 1916903 |      |
|                                                              | Csflr    | colony stimulating factor<br>1 receptor                               | 2.0 | 10456071 | 1339758 |      |
|                                                              | Ick      | intestinal cell kinase                                                | 1.9 | 10587299 | 1934157 |      |
|                                                              | Srpk2    | serine                                                                | 1.9 | 10528484 | 1201408 |      |
|                                                              | Pld2     | phospholipase D2                                                      | 1.9 | 10377859 | 892877  |      |
|                                                              | Cd36     | CD36 antigen                                                          | 1.9 | 10528207 | 107899  |      |
|                                                              | Ptptra   | protein tyrosine<br>phosphatase, receptor<br>type, A                  | 1.9 | 10476163 | 97808   |      |
|                                                              | Gnat3    | guanine nucleotide<br>binding protein, $\alpha$<br>transducing 3      | 1.9 | 10519905 | 3588268 |      |
|                                                              | Mtss1    | metastasis suppressor 1                                               | 1.8 | 10428857 | 2384818 |      |
|                                                              | Lpar1    | lysophosphatidic acid<br>receptor 1                                   | 1.8 | 10513256 | 108429  |      |
|                                                              | Tbc1d8b  | TBC1 domain family,<br>member 8B                                      | 1.8 | 10602020 | 1918101 |      |
|                                                              | Cacna1a  | calcium channel, voltage-<br>dependent, P                             | 1.8 | 10573348 | 109482  |      |
|                                                              | Edg5     | endothelial<br>differentiation,<br>sphingolipid G-protein-<br>coupled | 1.8 | 10591412 | 99569   |      |
| translation (33,<br>34)                                      | Impact   | imprinted and ancient                                                 | 2.1 | 10454039 | 1098233 |      |
|                                                              | Eif2c3   | eukaryotic translation<br>initiation factor 2C, 3                     | 1.8 | 10516348 | 2446634 |      |
| ubiquitin-<br>dependent<br>protein catabolic<br>process (33) | Gclc     | glutamate-cysteine ligase,<br>catalytic subunit                       | 8.2 | 10587266 | 104990  | (30) |
|                                                              | Rnf128   | ring finger protein 128                                               | 4.0 | 10602009 | 1914139 |      |
|                                                              | Fbxl20   | F-box and leucine-rich<br>repeat protein 20                           | 2.2 | 10390574 | 1919444 |      |
|                                                              | Herc3    | hect domain and RLD 3                                                 | 2.1 | 10538658 | 1921248 |      |
|                                                              | Map1lc3b | microtubule-associated<br>protein 1 light chain 3 $\beta$             | 2.1 | 10576056 | 1914693 |      |
|                                                              | Fbxo31   | F-box protein 31                                                      | 1.8 | 10582231 | 1354708 |      |
|                                                              | Fbxo30   | F-box protein 30                                                      | 1.8 | 10361748 | 1919115 |      |
|                                                              | Fbxl17   | F-box and leucine-rich<br>repeat protein 17                           | 1.8 | 10452430 | 1354704 |      |
|                                                              | Rnf167   | ring finger protein 167                                               | 1.8 | 10377927 | 1917760 |      |
|                                                              | Ube4b    | ubiquitination factor E4B,                                            | 1.8 | 10518642 | 1927086 |      |



|       |           |                                                                          |     |          |         |      |
|-------|-----------|--------------------------------------------------------------------------|-----|----------|---------|------|
| other | Arrdc3    | UFD2 homolog (S. cerevisiae)<br>arrestin domain containing 3             | 7.0 | 10406407 | 2145242 |      |
|       | Zdhhc18   | zinc finger, DHHC domain containing 18                                   | 2.9 | 10517070 | 3527792 | (30) |
|       | Gabarapl1 | $\gamma$ -aminobutyric acid (GABA(A)) receptor-associated protein-like 1 | 2.8 | 10542200 | 1914980 | (30) |
|       | Lrrfip2   | leucine rich repeat (in FLII) interacting protein 2                      | 1.8 | 10589723 | 1918518 |      |

<sup>a</sup> Genes up-regulated  $\geq 1.8$ -fold ( $p \leq 0.01$ ) at 6 h in HNE-treated RAW 264.7 cells that are associated with (1) specific genes or gene products correlated to malarial infection or HNE exposure (references listed by gene in column 7), or (2) specific overrepresented biological processes in malaria models (references listed with ontology in column 1), are shown in the table. Fold changes (FC) represent the average of three independent biological experiments. **Bold** FC indicate that multiple probes gave analogous results (average FC is shown).

Supporting Information Table 2. Selected Genes Down-Regulated by 35  $\mu$ M HNE at 6 h<sup>a</sup>

|                    | gene symbol | description                                         | fold change | Affymetrix probeset ID | MGI gene ID | ref |
|--------------------|-------------|-----------------------------------------------------|-------------|------------------------|-------------|-----|
| apoptosis (33, 34) | Phlda1      | pleckstrin homology-like domain, family A, member 1 | -2.6        | 10366346               | 1096880     |     |
|                    | Bcl2a1c     | B-cell leukemia                                     | -2.5        | 10589884               | 1278327     |     |
|                    | Ddit4       | DNA-damage-inducible transcript 4                   | -2.5        | 10369290               | 1921997     |     |
|                    | Stk17b      | serine                                              | -2.4        | 10354588               | 2138162     |     |
|                    | Bcl2a1b     | B-cell leukemia                                     | <b>-2.3</b> | 10587683               | 1278326     |     |
|                    |             |                                                     |             |                        | 10587690    |     |
| cell cycle (33)    | Tnfaip8     | tumor necrosis factor, $\alpha$ -induced protein 8  | -2.2        | 10455647               | 2147191     |     |
|                    | Xaf1        | XIAP associated factor 1                            | -2.1        | 10378068               | 3772572     |     |
|                    | Lif         | leukemia inhibitory factor                          | -11.6       | 10373918               | 96787       |     |
|                    | Plk1        | polo-like kinase 1 (Drosophila)                     | -8.6        | 10557156               | 97621       |     |
|                    | Kif11       | kinesin family member 11                            | -8.3        | 10462796               | 1098231     |     |

|        |                                                              |             |          |         |
|--------|--------------------------------------------------------------|-------------|----------|---------|
| Anln   | anillin, actin binding protein (scraps homolog, Drosophila)  | -7.3        | 10591781 | 1920174 |
| Nuf2   | NUF2, NDC80 kinetochore complex component, homolog (S. cere) | -6.8        | 10359890 | 1914227 |
| Kif20b | kinesin family member 20B                                    | -5.8        | 10462632 | 2444576 |
| Ccnb1  | cyclin B1                                                    | <b>-5.3</b> | 10411739 | 88302   |
|        |                                                              |             | 10562637 |         |
|        |                                                              |             | 10515836 |         |
| Ccna2  | cyclin A2                                                    | -5.1        | 10497831 | 108069  |
| Sgol2  | shugoshin-like 2 (S. pombe)                                  | -4.8        | 10346365 | 1098767 |
| Cdca2  | cell division cycle associated 2                             | -4.7        | 10421029 | 1919787 |
| Aspm   | asp (abnormal spindle)-like, microcephaly associated (Droso) | -4.5        | 10350392 | 1334448 |
| Ccnf   | cyclin F                                                     | -4.1        | 10448506 | 102551  |
| Nek6   | NIMA (never in mitosis gene a)-related expressed kinase 6    | -4.1        | 10471844 | 1891638 |
| Fbxo5  | F-box protein 5                                              | -4.0        | 10361375 | 1914391 |
| Mki67  | antigen identified by monoclonal antibody Ki 67              | -4.0        | 10568714 | 106035  |
| Cdc25c | cell division cycle 25 homolog C (S. pombe)                  | -3.9        | 10458195 | 88350   |
| Sgol1  | shugoshin-like 1 (S. pombe)                                  | -3.3        | 10451805 | 1919665 |
| Nek2   | NIMA (never in mitosis gene a)-related expressed kinase 2    | -3.2        | 10352767 | 109359  |
| Ccng2  | cyclin G2                                                    | -3.1        | 10523297 | 1095734 |
| Spag5  | sperm associated antigen 5                                   | -3.1        | 10379127 | 1927470 |
| Bub1b  | budding uninhibited by benzimidazoles 1 homolog, $\beta$ (S. | -2.9        | 10474769 | 1333889 |
| Smc4   | structural maintenance of chromosomes 4                      | -2.7        | 10492558 | 1917349 |
| Gsg2   | germ cell-specific gene 2                                    | -2.6        | 10388234 | 1194498 |
| Cks2   | CDC28 protein kinase regulatory subunit 2                    | <b>-2.5</b> | 10353004 | 1913447 |
|        |                                                              |             | 10405185 |         |
|        |                                                              |             | 10424779 |         |
| Espl1  | extra spindle poles-like 1 (S. cerevisiae)                   | -2.5        | 10427166 | 2146156 |
| Ndc80  | NDC80 homolog, kinetochore complex component (S. cerevisia)  | -2.5        | 10452709 | 1914302 |
| Birc5  | baculoviral IAP repeat-containing 5                          | -2.4        | 10382998 | 1203517 |
| Ercc61 | excision repair cross-complementing rodent repair deficie    | -2.4        | 10606071 | 2654144 |
| Sass6  | spindle assembly 6 homolog (C. elegans)                      | -2.4        | 10495574 | 1920026 |
| Cdkn2d | cyclin-dependent kinase inhibitor 2D (p19, inhibits CDK4)    | -2.3        | 10591517 | 105387  |
| Cenpa  | centromere protein A                                         | -2.3        | 10520521 | 88375   |
| E2f8   | E2F transcription factor 8                                   | -2.3        | 10563780 | 1922038 |
| Sesn2  | sestrin 2                                                    | -2.3        | 10516932 | 2651874 |
| Cdc25a | cell division cycle 25 homolog A (S. pombe)                  | -2.2        | 10589420 | 103198  |

|                                                        |        |                                                                       |             |                                  |         |
|--------------------------------------------------------|--------|-----------------------------------------------------------------------|-------------|----------------------------------|---------|
|                                                        | Dbf4   | DBF4 homolog ( <i>S. cerevisiae</i> )                                 | -2.2        | 10528077                         | 1351328 |
|                                                        | Fancd2 | Fanconi anemia, complementation group D2                              | -2.2        | 10540738                         | 2448480 |
|                                                        | Nusap1 | nucleolar and spindle associated protein 1                            | -2.1        | 10474984                         | 2675669 |
|                                                        | Cks1b  | CDC28 protein kinase 1b                                               | -1.8        | 10499639                         | 1889208 |
|                                                        | Nsl1   | NSL1, MIND kinetochore complex component, homolog ( <i>S. cerev</i> ) | -1.8        | 10352709                         | 2685830 |
| cell-cell signaling (34)                               | Pxk    | PX domain containing serine                                           | -3.3        | 10412624                         | 1289230 |
|                                                        | Agri   | agrin                                                                 | -2.0        | 10519270                         | 87961   |
|                                                        | Dlg7   | discs, large homolog 7 ( <i>Drosophila</i> )                          | -1.9        | 10419323                         | 2183453 |
| metabolic process (33)                                 | Hdc    | histidine decarboxylase                                               | -8.8        | 10487238                         | 96062   |
|                                                        | Pbk    | PDZ binding kinase                                                    | -4.6        | 10416037                         | 1289156 |
|                                                        | Abca1  | ATP-binding cassette, sub-family A (ABC1), member 1                   | -4.5        | 10512949                         | 99607   |
|                                                        | Mmp9   | matrix metalloproteinase 9                                            | -4.1        | 10478633                         | 97011   |
|                                                        | Lipg   | lipase, endothelial                                                   | -3.1        | 10459772                         | 1341803 |
|                                                        | Fgr    | Gardner-Rasheed feline sarcoma viral (Fgr) oncogene homolog           | -3.0        | 10508772                         | 95527   |
|                                                        | Dgkh   | diacylglycerol kinase, eta                                            | -2.2        | 10421774                         | 2444188 |
|                                                        | Neil3  | nei like 3 ( <i>E. coli</i> )                                         | -2.2        | 10578690                         | 2384588 |
|                                                        | Src    | Rous sarcoma oncogene                                                 | -2.2        | 10477970                         | 98397   |
|                                                        | Fbxo15 | F-box protein 15                                                      | -2.0        | 10457077                         | 1354755 |
|                                                        | Fen1   | flap structure specific endonuclease 1                                | -2.0        | 10465912                         | 102779  |
|                                                        | Alpk1  | $\alpha$ -kinase 1                                                    | <b>-1.9</b> | 10502042<br>10502050<br>10502052 | 1918731 |
|                                                        | Cry2   | cryptochrome 2 (photolyase-like)                                      | -1.9        | 10485170                         | 1270859 |
|                                                        | Mthfs  | 5, 10-methenyltetrahydrofolate synthetase                             | <b>-1.9</b> | 10587695<br>10595630             | 1340032 |
|                                                        | Rara   | retinoic acid receptor, $\alpha$                                      | -1.9        | 10381082                         | 97856   |
|                                                        | Anp32a | acidic (leucine-rich) nuclear phosphoprotein 32 family, m             | -1.8        | 10586064                         | 108447  |
|                                                        | Nab2   | Ngfi-A binding protein 2                                              | -1.8        | 10373313                         |         |
|                                                        | Pdss1  | prenyl (solaneyl) diphosphate synthase, subunit 1                     | -1.8        | 10469712                         | 1889278 |
|                                                        | Pgs1   | phosphatidylglycerophosphate synthase 1                               | -1.8        | 10383012                         | 1921701 |
|                                                        | Psmb10 | proteasome (prosome, macropain) subunit, $\beta$ type 10              | -1.8        | 10581378                         | 1096380 |
|                                                        | Rad54l | RAD54 like ( <i>S. cerevisiae</i> )                                   | -1.7        | 10515257                         | 894697  |
| cytokine and chemokine mediated signaling pathway (33) | Stat1  | signal transducer and activator of transcription 1                    | -2.2        | 10346191                         | 103063  |
|                                                        | Stat5a | signal transducer and activator of transcription 5A                   | -2.1        | 10381172                         | 103036  |
|                                                        | Stat3  | signal transducer and activator                                       | -2.0        | 10391301                         | 103038  |

|                                 |                                |                                                      |               |                                  |          |
|---------------------------------|--------------------------------|------------------------------------------------------|---------------|----------------------------------|----------|
|                                 |                                | of transcription 3                                   |               |                                  |          |
| defense<br>response (33,<br>34) | Jak2                           | Janus kinase 2                                       | -1.8          | 10462363                         | 96629    |
|                                 | Mx2                            | myxovirus (influenza virus)<br>resistance 2          | -7.9          | 10437224                         | 97244    |
|                                 | Saa3                           | serum amyloid A 3                                    | -7.3          | 10563597                         | 98223    |
|                                 | Ccr1                           | chemokine (C-C motif) receptor<br>1                  | -3.2          | 10598004                         | 104618   |
|                                 | Sp110                          | Sp110 nuclear body protein                           | <b>-2.6</b>   | 10347928<br>10356278<br>10582874 | 1923364  |
|                                 | Hck                            | hemopoietic cell kinase                              | -2.3          | 10477250                         | 96052    |
|                                 | Penk1                          | preproenkephalin 1                                   | -2.0          | 10511363                         | 104629   |
|                                 | Sbno2                          | strawberry notch homolog 2<br>(Drosophila)           | -2.0          | 10370721                         | 2448490  |
|                                 | Il1a                           | interleukin 1 $\alpha$                               | -67.1         | 10487588                         | 96542    |
|                                 | immune<br>response (33,<br>34) | Il6                                                  | interleukin 6 | -46.9                            | 10520452 |
| Il1b                            |                                | interleukin 1 $\beta$                                | -33.7         | 10487597                         | 96543    |
| Il1f6                           |                                | interleukin 1 family, member 6                       | -12.8         | 10469793                         | 1859324  |
| Cfb                             |                                | complement factor B                                  | -7.4          | 10450325                         | 105975   |
| H28                             |                                | histocompatibility 28                                | -6.9          | 10502801                         | 95975    |
| Il1rn                           |                                | interleukin 1 receptor<br>antagonist                 | -6.9          | 10469816                         | 96547    |
| Il27                            |                                | interleukin 27                                       | -6.5          | 10567987                         | 2384409  |
| Gbp5                            |                                | guanylate nucleotide binding<br>protein 5            | -6.3          | 10496539                         | 2429943  |
| Il10                            |                                | interleukin 10                                       | -5.4          | 10349603                         | 96537    |
| Oasl2                           |                                | 2'-5' oligoadenylate synthetase-<br>like 2           | -5.1          | 10524621                         | 1344390  |
| Clec2d                          |                                | C-type lectin domain family 2,<br>member d           | -4.7          | 10542156                         | 2135589  |
| Rsad2                           |                                | radical S-adenosyl methionine<br>domain containing 2 | -4.7          | 10399710                         | 1929628  |
| Cd40                            |                                | CD40 antigen                                         | -4.3          | 10478678                         | 88336    |
| Il1rl1                          |                                | interleukin 1 receptor-like 1                        | -4            | 10345791                         | 98427    |
| Cd300lf                         |                                | CD300 antigen like family<br>member F                | -3.9          | 10392845                         | 2442359  |
| Gbp3                            |                                | guanylate nucleotide binding<br>protein 3            | -3.8          | 10496580                         | 1926263  |
| Ccl6                            |                                | chemokine (C-C motif) ligand 6                       | -3.4          | 10389222                         | 98263    |
| Irf7                            |                                | interferon regulatory factor 7                       | -3.4          | 10569102                         | 1859212  |
| Gbp1                            |                                | guanylate nucleotide binding<br>protein 1            | -3.1          | 10496555                         | 95666    |
| Il18rap                         |                                | interleukin 18 receptor<br>accessory protein         | -3.0          | 10345824                         | 1338888  |
| Il4ra                           |                                | interleukin 4 receptor, $\alpha$                     | -2.9          | 10557326                         | 105367   |
| Cxcl14                          |                                | chemokine (C-X-C motif)<br>ligand 14                 | -2.8          | 10409579                         | 1888514  |
| Clec4n                          |                                | C-type lectin domain family 4,<br>member n           | -2.7          | 10541605                         | 1861231  |
| Irf8                            |                                | interferon regulatory factor 8                       | -2.5          | 10576034                         | 96395    |
| Il18                            |                                | interleukin 18                                       | -2.3          | 10585194                         | 107936   |
| Pou2f2                          |                                | POU domain, class 2,<br>transcription factor 2       | -2.1          | 10560964                         | 101897   |

|                                                 |          |                                                              |             |                                  |         |
|-------------------------------------------------|----------|--------------------------------------------------------------|-------------|----------------------------------|---------|
| inflammatory response (33, 34)                  | Clec12a  | C-type lectin domain family 12, member a                     | -2          | 10542164                         | 3040968 |
|                                                 | Clec5a   | C-type lectin domain family 5, member a                      | -1.9        | 10544273                         | 1345151 |
|                                                 | Ercc1    | excision repair cross-complementing rodent repair deficient  | -1.8        | 10550650                         | 95412   |
|                                                 | Ltb      | lymphotoxin B                                                | -1.8        | 10444752                         | 104796  |
|                                                 | Traf3ip2 | Traf3 interacting protein 2                                  | -1.8        | 10362615                         | 2143599 |
|                                                 | Ccl2     | chemokine (C-C motif) ligand 2                               | -47.2       | 10379511                         | 98259   |
|                                                 | Ccl7     | chemokine (C-C motif) ligand 7                               | -22.6       | 10379518                         | 99512   |
|                                                 | Ccl22    | chemokine (C-C motif) ligand 22                              | -13.0       | 10574213                         | 1306779 |
|                                                 | Fcgr2b   | Fc receptor, IgG, low affinity IIb                           | -7.7        | 10360028                         | 95499   |
|                                                 | Fcgr1    | Fc receptor, IgG, high affinity I                            | -4.4        | 10500335                         |         |
| intracellular protein transport (34)            | Cd44     | CD44 antigen                                                 | -2.7        | 10485405                         | 88338   |
|                                                 | Aoah     | acyloxyacyl hydrolase                                        | -2.3        | 10403871                         | 1350928 |
|                                                 | Ccl4     | chemokine (C-C motif) ligand 4                               | -2.2        | 10379721                         | 98261   |
|                                                 | Cd86     | CD86 antigen                                                 | -1.8        | 10439312                         | 101773  |
|                                                 | Jmjd3    | jumonji domain containing 3                                  | -1.8        | 10387372                         | 2448492 |
|                                                 | Ap1s3    | adaptor-related protein complex AP-1, $\sigma$ 3             | -2.2        | 10355967                         | 1891304 |
|                                                 | Tacc3    | transforming, acidic coiled-coil containing protein 3        | -2.1        | 10521090                         | 1341163 |
|                                                 | Kpna2    | karyopherin (importin) $\alpha$ 2                            | <b>-2.0</b> | 10392284<br>10453512<br>10497503 | 103561  |
|                                                 | Rffl     | ring finger and FYVE like domain containing protein          | -1.8        | 10389087                         | 1914588 |
|                                                 | Csf2     | colony stimulating factor 2 (granulocyte-macrophage)         | -14.0       | 10385912                         | 1339752 |
| regulation of apoptosis (34)                    | Bcl2l1   | Bcl2-like 1                                                  | -3.7        | 10488655                         | 88139   |
|                                                 | Notch1   | Notch gene homolog 1 (Drosophila)                            | -3.5        | 10481056                         | 97363   |
|                                                 | Casp4    | caspase 4, apoptosis-related cysteine peptidase              | -2.2        | 10582997                         | 107700  |
|                                                 | Casp7    | caspase 7                                                    | -2.0        | 10464128                         | 109383  |
|                                                 | Hells    | helicase, lymphoid specific                                  | -2.0        | 10462973                         | 106209  |
|                                                 | Ier3     | immediate early response 3                                   | -2.0        | 10444890                         | 104814  |
|                                                 | Trim30   | tripartite motif-containing 30                               | -7.2        | 10566358                         | 98178   |
|                                                 | Mxd1     | MAX dimerization protein 1                                   | -4.7        | 10545921                         | 96908   |
|                                                 | Jdp2     | Jun dimerization protein 2                                   | -4.3        | 10397351                         | 1932093 |
|                                                 | Top2a    | topoisomerase (DNA) II $\alpha$                              | -3.7        | 10390707                         | 98790   |
| regulation of transcription, DNA-dependent (34) | Nfkbiz   | nuclear factor of $\kappa$ light polypeptide gene enhancer i | -3.4        | 10439936                         | 1931595 |
|                                                 | Nr1d1    | nuclear receptor subfamily 1, group D, member 1              | -3.4        | 10390691                         | 2444210 |
|                                                 | Axud1    | AXIN1 up-regulated 1                                         | -3.0        | 10597758                         | 2387989 |
|                                                 | Bhlhb2   | basic helix-loop-helix domain                                | -3.0        | 10540472                         | 1097714 |

|         |                                                                      |             |                      |         |
|---------|----------------------------------------------------------------------|-------------|----------------------|---------|
|         | containing, class B2                                                 |             |                      |         |
| Osm     | oncostatin M                                                         | -3.0        | 10373912             | 104749  |
| Klf7    | Kruppel-like factor 7<br>(ubiquitous)                                | -2.6        | 10355141             | 1935151 |
| Foxm1   | forkhead box M1                                                      | -2.5        | 10542079             | 1347487 |
| Asf1b   | ASF1 anti-silencing function 1<br>homolog B ( <i>S. cerevisiae</i> ) | -2.4        | 10573261             | 1914179 |
| Foxp1   | forkhead box P1                                                      | -2.4        | 10546661             | 1914004 |
| Nr4a1   | nuclear receptor subfamily 4,<br>group A, member 1                   | -2.3        | 10427035             | 1352454 |
| Carhsp1 | calcium regulated heat stable<br>protein 1                           | <b>-2.1</b> | 10437590<br>10497752 | 1196368 |
| Hivep3  | human immunodeficiency virus<br>type I enhancer binding prot         | -2          | 10507677             | 106589  |
| Id1     | inhibitor of DNA binding 1                                           | -2.0        | 10477169             | 96396   |
| Zfp367  | zinc finger protein 367                                              | -2.0        | 10410092             | 2442266 |
| Plagl2  | pleiomorphic adenoma gene-<br>like 2                                 | -1.9        | 10488697             | 1933165 |
| Zfp36   | zinc finger protein 36                                               | -1.9        | 10561453             | 99180   |
| Akna    | AT-hook transcription factor                                         | -1.8        | 10513666             | 2140340 |
| Arid5a  | AT rich interactive domain 5A<br>(Mrf1 like)                         | -1.8        | 10345445             | 2443039 |
| Batf2   | basic leucine zipper<br>transcription factor, ATF-like 2             | -1.8        | 10460767             | 1921731 |
| Hivep2  | human immunodeficiency virus<br>type I enhancer binding prot         | -1.8        | 10361807             | 1338076 |
| Hlx     | H2.0-like homeobox                                                   | -1.8        | 10360834             | 96109   |
| Ikzf1   | IKAROS family zinc finger 1                                          | -1.8        | 10374333             | 1342540 |
| Nfkb1   | nuclear factor of $\kappa$ light<br>polypeptide gene enhancer in     | -1.8        | 10502299             | 97312   |
| Nufip1  | nuclear fragile X mental<br>retardation protein interacting          | -1.8        | 10416510             | 1351474 |
| Pcgf5   | polycomb group ring finger 5                                         | -1.8        | 10462683             | 1923505 |
| Thra    | thyroid hormone receptor $\alpha$                                    | -1.8        | 10381006             | 98742   |
| F3      | coagulation factor III                                               | -5.6        | 10495675             | 88381   |
| Gen1    | Gen homolog 1, endonuclease<br>( <i>Drosophila</i> )                 | -5.2        | 10399391             | 2443149 |
| Blm     | Bloom syndrome homolog<br>(human)                                    | -3.4        | 10564978             | 1328362 |
| Ifi47   | interferon $\gamma$ inducible protein<br>47                          | -3.0        | 10375515             | 99448   |
| Ddx58   | DEAD (Asp-Glu-Ala-Asp) box<br>polypeptide 58                         | -2.5        | 10512067             | 2442858 |
| Trip13  | thyroid hormone receptor<br>interactor 13                            | -2.4        | 10410560             | 1916966 |
| Dhx58   | DEXH (Asp-Glu-X-His) box<br>polypeptide 58                           | -2.2        | 10391207             | 1931560 |
| Polq    | polymerase (DNA directed),<br>theta                                  | -2.2        | 10435581             | 2155399 |
| Ifih1   | interferon induced with helicase<br>C domain 1                       | -2.0        | 10483110             | 1918836 |
| Eme1    | essential meiotic endonuclease<br>1 homolog 1 ( <i>S. pombe</i> )    | -1.9        | 10390050             | 3576783 |
| Atad5   | ATPase family, AAA domain<br>containing 5                            | -1.8        | 10379363             | 2442925 |

response to  
stress (34)

|                                                    |                                                             |                                                         |             |                      |         |
|----------------------------------------------------|-------------------------------------------------------------|---------------------------------------------------------|-------------|----------------------|---------|
| signal transduction (33)                           | Cry1                                                        | cryptochrome 1 (photolyase-like)                        | -1.8        | 10371400             | 1270841 |
|                                                    | Rad51                                                       | RAD51 homolog ( <i>S. cerevisiae</i> )                  | -1.8        | 10474902             | 97890   |
|                                                    | Gpr109a                                                     | G protein-coupled receptor 109A                         | -10         | 10533720             | 1933383 |
|                                                    | Edn1                                                        | endothelin 1                                            | -9.2        | 10404783             | 95283   |
|                                                    | Rnd1                                                        | Rho family GTPase 1                                     | -6.7        | 10432236             | 2444878 |
|                                                    | Adora2b                                                     | adenosine A2b receptor                                  | -5.5        | 10376832             | 99403   |
|                                                    | Ms4a6c                                                      | membrane-spanning 4-domains, subfamily A, member 6C     | -3.6        | 10461614             | 2385644 |
|                                                    | Itgal                                                       | integrin $\alpha$ L                                     | -3.1        | 10557591             | 96606   |
|                                                    | Arhgef3                                                     | Rho guanine nucleotide exchange factor (GEF) 3          | -3.0        | 10413419             | 1918954 |
|                                                    | Bcar3                                                       | breast cancer anti-estrogen resistance 3                | -3.0        | 10495781             | 1352501 |
|                                                    | Cish                                                        | cytokine inducible SH2-containing protein               | -3.0        | 10588577             | 103159  |
|                                                    | Rassf2                                                      | Ras association (RalGDS                                 | -2.9        | 10487894             | 2442060 |
|                                                    | Arhgap11a                                                   | Rho GTPase activating protein 11A                       | -2.7        | 10485963             | 2444300 |
|                                                    | Cysltr1                                                     | cysteinyl leukotriene receptor 1                        | -2.7        | 10606355             | 1926218 |
|                                                    | Pscd4                                                       | pleckstrin homology, Sec7 and coiled                    | -2.6        | 10425092             | 2441702 |
|                                                    | Mt2                                                         | metallothionein 2                                       | -2.5        | 10574023             | 97172   |
|                                                    | Itgam                                                       | integrin $\alpha$ M                                     | -2.3        | 10557862             | 96607   |
|                                                    | Ms4a6d                                                      | membrane-spanning 4-domains, subfamily A, member 6D     | -2.3        | 10466210             | 1916024 |
|                                                    | Wdr67                                                       | WD repeat domain 67                                     | -2.2        | 10424221             | 2684931 |
|                                                    | P2ry2                                                       | purinergic receptor P2Y, G-protein coupled 2            | -2.1        | 10565962             | 105107  |
| Pik3cd                                             | phosphatidylinositol 3-kinase catalytic delta polypeptide   | -2.1                                                    | 10518686    | 1098211              |         |
| Bcl3                                               | B-cell leukemia                                             | -2.0                                                    | 10560685    | 88140                |         |
| Ccl17                                              | chemokine (C-C motif) ligand 17                             | -2.0                                                    | 10574226    | 1329039              |         |
| Fpr3                                               | formyl peptide receptor 3                                   | -2.0                                                    | 10442098    | 1194495              |         |
| Irak3                                              | interleukin-1 receptor-associated kinase 3                  | -2.0                                                    | 10372781    | 1921164              |         |
| Eif2ak2                                            | eukaryotic translation initiation factor 2- $\alpha$ kinase | -1.9                                                    | 10452980    | 1353449              |         |
| Lyn                                                | Yamaguchi sarcoma viral (v-src) oncogene homolog            | -1.9                                                    | 10503098    | 96892                |         |
| Hus1                                               | Hus1 homolog ( <i>S. pombe</i> )                            | -1.8                                                    | 10384322    | 1277962              |         |
| Per1                                               | period homolog 1 ( <i>Drosophila</i> )                      | -1.8                                                    | 10377439    | 1098283              |         |
| Ptger4                                             | prostaglandin E receptor 4 (subtype EP4)                    | -1.8                                                    | 10427461    | 104311               |         |
| translation (33, 34)                               | Denr                                                        | density-regulated protein                               | -2.3        | 10525657             | 1915434 |
|                                                    | Ppp1r15b                                                    | protein phosphatase 1, regulatory (inhibitor) subunit 1 | -1.8        | 10349868             | 2444211 |
| ubiquitin-dependent protein catabolic process (33) | Socs3                                                       | suppressor of cytokine signaling 3                      | <b>-5.1</b> | 10383010<br>10393449 | 1201791 |

|       |         |                                                             |      |          |         |
|-------|---------|-------------------------------------------------------------|------|----------|---------|
|       | Usp18   | ubiquitin specific peptidase 18                             | -3.7 | 10541307 | 1344364 |
|       | Tnfaip3 | tumor necrosis factor, $\alpha$ - induced protein 3         | -3.0 | 10368144 | 1196377 |
|       | Herc5   | hect domain and RLD 5                                       | -2.5 | 10538590 | 1914388 |
|       | Cdc20   | cell division cycle 20 homolog (S. cerevisiae)              | -2.2 | 10515744 | 1859866 |
|       | Isg15   | ISG15 ubiquitin-like modifier                               | -2.2 | 10451287 | 1855694 |
|       | Ube2c   | ubiquitin-conjugating enzyme E2C                            | -2.0 | 10478572 | 1915862 |
|       | Uhrf1   | ubiquitin-like, containing PHD and RING finger domains, 1   | -1.9 | 10446074 | 1338889 |
|       | Rabgef1 | RAB guanine nucleotide exchange factor (GEF) 1              | -1.8 | 10526133 | 1929459 |
|       | Ube2l6  | ubiquitin-conjugating enzyme E2L 6                          | -1.8 | 10473356 | 1914500 |
| other | Usp37   | ubiquitin specific peptidase 37                             | -1.8 | 10355582 | 2442483 |
|       | Ifit2   | interferon-induced protein with tetratricopeptide repeats 2 | -6.5 | 10462613 | 99449   |
|       | Ifi205  | interferon activated gene 205                               | -4.3 | 10360406 | 101847  |
|       | Ifit1   | interferon-induced protein with tetratricopeptide repeats 1 | -4.0 | 10462623 | 99450   |
|       | Ifi202b | interferon activated gene 202B                              | -3.9 | 10360398 | 1347083 |
|       | Ifi204  | interferon activated gene 204                               | -3.9 | 10360382 | 96429   |
|       | Ifit3   | interferon-induced protein with tetratricopeptide repeats 3 | -3.8 | 10462618 | 1101055 |
|       | Ifi203  | interferon activated gene 203                               | -3.7 | 10360391 | 96428   |
|       | Samsn1  | SAM domain, SH3 domain and nuclear localization signals, 1  | -3.5 | 10440393 | 1914992 |
|       | Ifitm2  | interferon induced transmembrane protein 2                  | -1.9 | 10553299 | 1933382 |

<sup>a</sup> Genes down-regulated  $\leq 1.8$ -fold ( $p \leq 0.01$ ) at 6 h in HNE-treated RAW 264.7 cells that are associated with specific overrepresented biological processes in malaria models (references listed with ontology in column 1) are shown in the table. Fold changes (FC) represent the average of three independent biological experiments. **Bold** FC indicate that multiple probes gave analogous results (average FC is shown).

Supporting Information Table 3. Selected Genes Down-Regulated by 35  $\mu$ M HNE at 24 h<sup>a</sup>

|                    | gene symbol | description                           | fold change | ABI probeset ID | MGI gene ID |
|--------------------|-------------|---------------------------------------|-------------|-----------------|-------------|
| apoptosis (33, 34) | Sgk         | serum/glucocorticoid regulated kinase | -6.6        | 929684          | 1340062     |
|                    | Axud1       | AXIN1 up-regulated 1                  | -1.8        | 907214          | 2387989     |



|                                                        |            |                                                                                   |       |        |         |
|--------------------------------------------------------|------------|-----------------------------------------------------------------------------------|-------|--------|---------|
| cell cycle (33)                                        | Slfn1      | schlafen 1                                                                        | -15.0 | 371033 | 1313259 |
|                                                        | Sass6      | spindle assembly 6 homolog (C. elegans)                                           | -4.6  | 881483 | 1920026 |
|                                                        | Nbn        | nibrin                                                                            | -3.4  | 430613 | 1351625 |
|                                                        | Plekho1    | pleckstrin homology domain containing, family O member 1                          | -2.4  | 624539 | 1914470 |
|                                                        | Als2cr2    | amyotrophic lateral sclerosis 2 (juvenile) chromosome region, candidate 2 (human) | -2.3  | 358886 | 2144047 |
| cell-cell signaling (34)                               | Pols       | polymerase (DNA directed) $\sigma$                                                | -1.9  | 732359 | 2682295 |
|                                                        | Kif1b      | kinesin family member 1B                                                          | -5.8  | 744344 | 108426  |
|                                                        | Tsc1       | tuberous sclerosis 1                                                              | -3.1  | 550748 | 1929183 |
|                                                        | Gata3      | GATA binding protein 3                                                            | -2.3  | 580073 | 95663   |
|                                                        | Ly6e       | lymphocyte antigen 6 complex, locus E                                             | -2.3  | 927958 | 106651  |
| metabolic process (33)                                 | Avil       | advillin                                                                          | -8.1  | 530983 | 1333798 |
|                                                        | Dio2       | deiodinase, iodothyronine, type II                                                | -6.9  | 738397 | 1338833 |
| cytokine and chemokine mediated signaling pathway (33) | Stat1      | signal transducer and activator of transcription 1                                | -10.8 | 433757 | 103063  |
|                                                        | Il6st (33) | interleukin 6 signal transducer myxovirus (influenza virus) resistance 2          | -2.7  | 647028 | 96560   |
| defense response (33, 34)                              | Irgm       | immunity-related GTPase family, M                                                 | -43.4 | 837469 | 97244   |
|                                                        | Dhx58      | DEXH (Asp-Glu-X-His) box polypeptide 58                                           | -15.0 | 804608 | 107567  |
|                                                        | B2m        | $\beta$ -2 microglobulin                                                          | -7.9  | 659648 | 1931560 |
| immune response (33, 34)                               | Irf7       | interferon regulatory factor 7                                                    | -2.5  | 501966 | 88127   |
|                                                        | Ddx58      | DEAD (Asp-Glu-Ala-Asp) box polypeptide 58                                         | -51.3 | 345690 | 1859212 |
|                                                        | Ibrdc3     | IBR domain containing 3                                                           | -17.4 | 439516 | 2442858 |
| inflammatory response (33, 34)                         | Ccl5       | chemokine (C-C motif) ligand 5                                                    | -2.2  | 695308 | 1922484 |
|                                                        | Fcgr1      | Fc receptor, IgG, high affinity I                                                 | -22.7 | 516139 | 98262   |
| regulation of apoptosis (34)                           | Il6        | interleukin 6                                                                     | -13.6 | 922856 | 95498   |
|                                                        | Fcgr2b     | Fc receptor, IgG, low affinity IIb                                                | -11.2 | 924312 | 96559   |
|                                                        | Ccl7       | chemokine (C-C motif) ligand 7                                                    | -2.9  | 930585 | 95499   |
|                                                        | Ern1       | endoplasmic reticulum (ER) to nucleus signalling 1                                | -2.3  | 562485 | 99512   |
|                                                        | Tsc22d3    | TSC22 domain family 3                                                             | -12.3 | 749047 | 1930134 |
| regulation of transcription, DNA-dependent (34)        | Traf3      | Tnf receptor-associated factor 3                                                  | -3.6  | 700170 | 1196284 |
|                                                        | Casp1      | caspase 1                                                                         | -2.3  | 613464 | 108041  |
|                                                        | Gatad2b    | GATA zinc finger domain containing 2B                                             | -2.0  | 924714 | 96544   |
|                                                        | Ssbp3      | single-stranded DNA binding protein 3                                             | -3.9  | 332294 | 2443225 |
|                                                        | Tspyl2     | TSPY-like 2                                                                       | -2.7  | 602705 | 1919725 |
| response to stress (34)                                | Usf2       | upstream transcription factor 2                                                   | -2.5  | 526767 | 106244  |
|                                                        | Pcgf5      | polycomb group ring finger 5                                                      | -2.1  | 532994 | 99961   |
|                                                        | Zfp30      | zinc finger protein 30                                                            | -2.1  | 315886 | 1923505 |
|                                                        | Gna13      | guanine nucleotide binding protein, $\alpha$ 13                                   | -2.0  | 919271 | 99178   |
|                                                        |            |                                                                                   | -2.5  | 576697 | 95768   |
|                                                        |            |                                                                                   |       |        |         |

|                                                          |         |                                                     |        |        |         |
|----------------------------------------------------------|---------|-----------------------------------------------------|--------|--------|---------|
| signal transduction<br>(33)                              | Insig2  | insulin induced gene 2                              | -2.3   | 603014 | 1920249 |
|                                                          | Rassf8  | Ras association (RalGDS/AF-6)<br>domain family 8    | -5.0   | 704046 | 1918573 |
|                                                          | Rgs1    | regulator of G-protein signaling 1                  | -3.9   | 923224 | 1354694 |
|                                                          | Nr3c1   | nuclear receptor subfamily 3,<br>group C, member 1  | -3.0   | 477364 | 95824   |
| translation (33, 34)                                     | Tbc1d12 | TBC1D12: TBC1 domain family,<br>member 12           | -2.6   | 360619 | 2384803 |
|                                                          | Spry1   | sprouty homolog 1 (Drosophila)                      | -1.9   | 404045 | 1345139 |
|                                                          | Mknk1   | MAP kinase-interacting<br>serine/threonine kinase 1 | -5.5   | 679668 | 894316  |
|                                                          | Eif2c2  | eukaryotic translation initiation<br>factor 2C, 2   | -5.2   | 526883 | 2446632 |
|                                                          | Impact  | imprinted and ancient                               | -4.4   | 627739 | 1098233 |
| ubiquitin-dependent<br>protein catabolic<br>process (33) | Eif2c3  | eukaryotic translation initiation<br>factor 2C, 3   | -3.6   | 526537 | 2446634 |
|                                                          | Usp18   | ubiquitin specific peptidase 18                     | -100.0 | 446807 | 1344364 |
|                                                          | Fbxo39  | F-box protein 39                                    | -87.4  | 642750 | 3505735 |
|                                                          | Fem1c   | fem-1 homolog c (C.elegans)                         | -4.1   | 762818 | 2444737 |
|                                                          | Wsb2    | WD repeat and SOCS box-<br>containing 2             | -2.6   | 740571 | 2144041 |
|                                                          | Ube2l6  | ubiquitin-conjugating enzyme<br>E2L 6               | -2.3   | 401185 | 1914500 |
|                                                          | Sumo3   | SMT3 suppressor of mif two 3<br>homolog 3 (yeast)   | -2.0   | 463700 | 1336201 |
|                                                          | Fbxl20  | F-box and leucine-rich repeat<br>protein 20         | -2.0   | 331560 | 1919444 |

<sup>a</sup> Genes down-regulated  $\leq 1.8$ -fold ( $p \leq 0.01$ ) at 24 h in HNE-treated RAW 264.7 cells that are associated with specific overrepresented biological processes in malaria models (references listed with ontology in column 1) are shown in the table. Fold changes (FC) represent the average of three independent biological experiments.

Supporting Information Table 4. Selected Genes Up-Regulated by 35  $\mu$ M HNE at 24 h<sup>a</sup>

|                    | gene<br>symbol | description                                                  | fold<br>change | ABI<br>probeset<br>ID | MGI<br>gene ID | ref |
|--------------------|----------------|--------------------------------------------------------------|----------------|-----------------------|----------------|-----|
| apoptosis (33, 34) | Pdcd8          | programmed cell death 8                                      | 2.1            | 26926                 | 1349419        |     |
|                    | Stk3           | serine/threonine kinase 3<br>(Ste20, yeast homolog)          | 1.9            | 56274                 | 1928487        |     |
|                    | Tnfaip8        | tumor necrosis factor, $\alpha$ -<br>induced protein 8       | 1.9            | 106869                | 2147191        |     |
| cell cycle (33)    | Nek2           | NIMA (never in mitosis gene<br>a)-related expressed kinase 2 | 17.0           | 18005                 | 109359         |     |
|                    | Psmc3ip        | proteasome (prosome,                                         | 6.4            | 19183                 | 1098610        |     |

|                                            |        |                                                                                                         |            |                  |         |                          |
|--------------------------------------------|--------|---------------------------------------------------------------------------------------------------------|------------|------------------|---------|--------------------------|
|                                            | Zbtb36 | macropain) 26S subunit,<br>ATPase 3, interacting protein<br>zinc finger and BTB domain<br>containing 36 | 2.3        | 207259           | 2443302 |                          |
|                                            | Atm    | ataxia telangiectasia mutated<br>homolog (human)                                                        | 1.9        | 11920            | 107202  | (30)                     |
| cell-cell signaling<br>(34)                | Dlg7   | discs, large homolog 7<br>(Drosophila)                                                                  | 12.1       | 218977           | 2183453 |                          |
|                                            | Wnt6   | wingless-related MMTV<br>integration site 6                                                             | 4.4        | 22420            | 98960   |                          |
|                                            | Cadps  | Ca <sup>2+</sup> -dependent activator<br>protein for secretion                                          | 2.2        | 27062            | 1350922 |                          |
|                                            | Hprt1  | hypoxanthine guanine<br>phosphoribosyl transferase 1                                                    | 1.9        | 15452            | 96217   |                          |
| metabolic process<br>(33)                  | Asf1b  | ASF1 anti-silencing function<br>1 homolog B (S. cerevisiae)                                             | 9.7        | 66929            | 1914179 |                          |
| defense response<br>(33, 34)               | Car12  | carbonic anhydrase 12                                                                                   | 4.7        | 76459            | 1923709 |                          |
|                                            | Cias1  | cold autoinflammatory<br>syndrome 1 homolog<br>(human)                                                  | 8.3        | 216799           | 2653833 |                          |
|                                            | Ccl17  | chemokine (C-C motif)<br>ligand 17                                                                      | 3.1        | 20295            | 1329039 |                          |
|                                            | Fgr    | Gardner-Rasheed feline<br>sarcoma viral (Fgr) oncogene<br>homolog                                       | 2.8        | 14191            | 95527   |                          |
| immune response<br>(33, 34)                | Csf3   | colony stimulating factor 3<br>(granulocyte)                                                            | 17.5       | 12985            | 1339751 |                          |
|                                            | Tnf    | tumor necrosis factor                                                                                   | 8.7        | 21926            | 104798  | (9,<br>10,<br>33,<br>72) |
|                                            | Clec5a | C-type lectin domain family<br>5, member a                                                              | 5.0        | 23845            | 1345151 |                          |
|                                            | Raet1e | retinoic acid early transcript<br>1E                                                                    | 3.8        | 379043           | 2675273 |                          |
|                                            | Il10ra | Interleukin 10 receptor $\alpha$                                                                        | 3.7        | 340636           | 96538   | (31)                     |
|                                            | Cxcl1  | chemokine (C-X-C motif)<br>ligand 1                                                                     | 2.7        | 14825            | 108068  |                          |
|                                            | Nfam1  | Nfat activating molecule<br>with ITAM motif 1                                                           | <b>2.7</b> | 623312<br>489525 | 1921289 |                          |
|                                            | Tgfb1  | transforming growth factor, $\beta$<br>1                                                                | 2.0        | 21803            | 98725   |                          |
| inflammatory<br>response (33, 34)          | Pla2g7 | phospholipase A2, group VII<br>(platelet-activating factor<br>acetylhydrolase, plasma)                  | 10.7       | 27226            | 1351327 |                          |
|                                            | C5r1   | Complement component 5,<br>receptor 1                                                                   | 3.4        | 338868           | 88232   | (30,<br>31)              |
|                                            | Nlrc4  | NLR family, CARD domain<br>containing 4                                                                 | 2.7        | 268973           | 3036243 |                          |
|                                            | Cd14   | CD14 antigen                                                                                            | 2.2        | 12475            | 88318   | (30)                     |
| intracellular<br>protein transport<br>(34) | Nup85  | nucleoporin 85                                                                                          | 3.3        | 445007           | 3046173 |                          |
|                                            | Prdx1  | peroxiredoxin 1                                                                                         | <b>2.9</b> | 18477<br>545161  | 99523   | (32)                     |

|                                                 |         |                                                                                                  |      |        |         |          |
|-------------------------------------------------|---------|--------------------------------------------------------------------------------------------------|------|--------|---------|----------|
|                                                 | Pcna    | proliferating cell nuclear antigen                                                               | 2.3  | 18538  | 97503   |          |
|                                                 | Pex7    | peroxisome biogenesis factor 7                                                                   | 2.0  | 18634  | 1321392 |          |
| metabolic process (33)                          | Nup210  | nucleoporin 210                                                                                  | 1.9  | 54563  | 1859555 |          |
|                                                 | Echdc3  | enoyl Coenzyme A hydratase domain containing 3                                                   | 5.4  | 67856  | 1915106 |          |
|                                                 | Gnaq    | guanine nucleotide binding protein, $\alpha$ q polypeptide                                       | 3.0  | 14682  | 95776   |          |
|                                                 | Suc1g1  | succinate-CoA ligase, GDP-forming, $\alpha$ subunit                                              | 1.8  | 56451  | 1927234 |          |
| protein folding (34)                            | Ppid    | peptidylprolyl isomerase D (cyclophilin D)                                                       | 3.3  | 67738  | 1914988 |          |
|                                                 | Ppil1   | peptidylprolyl isomerase (cyclophilin)-like 1                                                    | 2.5  | 68816  | 1916066 |          |
| regulation of apoptosis (34)                    | Birc5   | baculoviral IAP repeat-containing 5                                                              | 27.4 | 11799  | 1203517 |          |
|                                                 | Mmp9    | matrix metalloproteinase 9                                                                       | 5.2  | 17395  | 97011   | (30)     |
| regulation of transcription, DNA-dependent (34) | Igf1    | insulin-like growth factor 1                                                                     | 2.1  | 16000  | 96432   |          |
|                                                 | Top2a   | topoisomerase (DNA) II $\alpha$                                                                  | 13.2 | 21973  | 98790   |          |
|                                                 | Mcm6    | minichromosome maintenance deficient 6 (MIS5 homolog, <i>S. pombe</i> ) ( <i>S. cerevisiae</i> ) | 6.0  | 17219  | 1298227 |          |
|                                                 | Tbl1xr1 | transducin ( $\beta$ )-like 1X-linked receptor 1                                                 | 3.5  | 81004  | 2441730 |          |
|                                                 | Bzw1    | basic leucine zipper and W2 domains 1                                                            | 2.9  | 66882  | 1914132 |          |
|                                                 | Hmga2   | high mobility group AT-hook 2                                                                    | 2.1  | 15364  | 101761  |          |
| response to stress (34)                         | Rad51   | RAD51 homolog ( <i>S. cerevisiae</i> )                                                           | 16.4 | 19361  | 97890   |          |
|                                                 | Pole    | polymerase (DNA directed), $\epsilon$                                                            | 15.4 | 18973  | 1196391 |          |
|                                                 | Sod2    | superoxide dismutase 2, mitochondrial                                                            | 9.1  | 20656  | 98352   | (30, 31) |
|                                                 | Tacc3   | transforming, acidic coiled-coil containing protein 3                                            | 7.3  | 21335  | 1341163 |          |
|                                                 | Trip13  | thyroid hormone receptor interactor 13                                                           | 7.1  | 69716  | 1916966 |          |
| signal transduction (33)                        | Msh5    | mutS homolog 5 ( <i>E. coli</i> )                                                                | 6.1  | 17687  | 1329021 |          |
|                                                 | Pilra   | paired immunoglobulin-like type 2 receptor $\alpha$                                              | 13.5 | 640067 | 2450529 |          |
|                                                 | Rasgrp3 | RAS, guanyl releasing protein 3                                                                  | 4.4  | 240168 | 3028579 |          |
|                                                 | Rab11a  | RAB11a, member RAS oncogene family                                                               | 4.3  | 53869  | 1858202 |          |
|                                                 | Igpb1b  | immunoglobulin (CD79A) binding protein 1b                                                        | 2.8  | 50540  | 1354380 |          |
|                                                 | Gpr183  | G protein-coupled receptor 183                                                                   | 2.3  | 321019 | 2442034 |          |
| translation (33, 34)                            | Eif4e   | eukaryotic translation initiation factor 4E                                                      | 4.2  | 13684  | 95305   |          |

|                                                    |                                                            |                                                      |            |         |         |      |
|----------------------------------------------------|------------------------------------------------------------|------------------------------------------------------|------------|---------|---------|------|
| ubiquitin-dependent protein catabolic process (33) | Eif4e2                                                     | eukaryotic translation initiation factor 4E member 2 | 3.4        | 26987   | 1914440 |      |
|                                                    | Pa2g4                                                      | proliferation-associated 2G4                         | 2.3        | 18813   | 894684  |      |
|                                                    | Eif5a                                                      | eukaryotic translation initiation factor 5A          | <b>1.9</b> | 549097  | 106248  |      |
|                                                    |                                                            |                                                      |            | 925942  |         |      |
|                                                    | Pet112l                                                    | PET112-like (yeast)                                  | 1.8        | 229487  | 2442496 |      |
|                                                    | Ube2t                                                      | ubiquitin-conjugating enzyme E2T (putative)          | 7.1        | 67196   | 1914446 |      |
|                                                    | Fbxo5                                                      | F-box only protein 5                                 | 4.4        | 67141   | 1914391 |      |
|                                                    | Ggnbp1                                                     | gametogenetin binding protein 1                      | 3.5        | 70772   | 3055306 |      |
|                                                    | Fbxo22                                                     | F-box only protein 22                                | 3.0        | 71999   | 1926014 |      |
|                                                    | Ube2i                                                      | ubiquitin-conjugating enzyme E2I                     | 3.0        | 22196   | 107365  |      |
| Ube2d3                                             | ubiquitin-conjugating enzyme E2D 3 (UBC4/5 homolog, yeast) | 2.4                                                  | 66105      | 1913355 |         |      |
| Bre                                                | brain and reproductive organ-expressed protein             | 1.9                                                  | 107976     | 1333875 |         |      |
| other                                              | Gsn                                                        | Gelsolin                                             | 2.5        | 437857  | 95851   | (30) |
|                                                    | Rad23a                                                     | RAD23a homolog (S. cerevisiae)                       | 2.2        | 330310  | 105126  | (30) |

<sup>a</sup> Genes up-regulated  $\geq 1.8$ -fold ( $p \leq 0.01$ ) at 24 h in HNE-treated RAW 264.7 cells that are associated with (1) specific genes or gene products correlated to malarial infection or HNE exposure (references listed by gene in column 7), or (2) specific overrepresented biological processes in malaria models (references listed with ontology in column 1) are shown in the table. Fold changes (FC) represent the average of three independent biological experiments. **Bold** FC indicate that multiple probes gave analogous results (average FC is shown).

Table 5. Selected Genes Up-Regulated by 0.1 mg/mL BH at 6 h<sup>a</sup>

|                          | gene symbol | description                                              | fold change | Affymetrix probeset ID | MGI gene ID | ref |
|--------------------------|-------------|----------------------------------------------------------|-------------|------------------------|-------------|-----|
| cell cycle (33)          | Rps6ka2     | ribosomal protein S6 kinase, polypeptide 2               | 2.6         | 10441565               | 1342290     |     |
|                          | Plk2        | polo-like kinase 2 (Drosophila)                          | 2.2         | 10407126               | 1099790     |     |
|                          | Plekh01     | pleckstrin homology domain containing, family O member 1 | 1.9         | 10500295               | 1914470     |     |
| immune response (33, 34) | Fabp3       | fatty acid binding protein 3, muscle and heart           | <b>4.2</b>  | 10371502<br>10508614   | 95476       |     |
|                          | F10         | coagulation factor X                                     | 2.7         | 10570291               | 103107      |     |
|                          | Il7r        | interleukin 7 receptor                                   | 2.6         | 10427628               | 96562       |     |

|                          |         |                                                           |     |          |         |          |
|--------------------------|---------|-----------------------------------------------------------|-----|----------|---------|----------|
|                          | Hmox1   | heme oxygenase (decycling) 1                              | 2.5 | 10572897 | 96163   | (30, 31) |
|                          | Aadacl1 | arylacetamide deacetylase-like 1                          | 1.9 | 10491083 | 2443191 |          |
|                          | Eno2    | enolase 2, $\gamma$ neuronal                              | 1.8 | 10547807 | 95394   |          |
|                          | Mtmr10  | myotubularin related protein 10                           | 1.8 | 10553897 | 2142292 |          |
| signal transduction (33) | Gprc5a  | G protein-coupled receptor, family C, group 5, member A   | 2.3 | 10542335 | 1891250 |          |
|                          | Bcar3   | breast cancer anti-estrogen resistance 3                  | 1.9 | 10495781 | 1352501 |          |
|                          | Plxna2  | plexin A2                                                 | 1.9 | 10352867 | 107684  |          |
|                          | Adra1a  | adrenergic receptor, $\alpha$ 1a                          | 1.8 | 10416099 | 104773  |          |
|                          | Plekhm1 | pleckstrin homology domain containing, family M (with RU) | 1.8 | 10391918 | 2443207 |          |
|                          | Gpr176  | G protein-coupled receptor 176                            | 1.7 | 10486102 | 2685858 |          |
| other                    | Slamf7  |                                                           | 3.4 | 10360173 |         | (31)     |
|                          | Hk3     |                                                           | 1.8 | 10409376 |         | (30)     |

<sup>a</sup> Genes up-regulated  $\geq 1.8$ -fold ( $p \leq 0.01$ ) at 6 h in BH-treated RAW 264.7 cells that are associated with (1) specific genes or gene products correlated to malarial infection or HNE exposure (references listed by gene in column 7), or (2) specific overrepresented biological processes in malaria models (references listed with ontology in column 1) are shown in the table. Fold changes (FC) represent the average of three independent biological experiments. **Bold** FC indicate that multiple probes gave analogous results (average FC is shown).

Supporting Information Table 6. Selected Genes Down-Regulated by 0.1 mg/mL BH at 6 h<sup>a</sup>

|                          | gene symbol | description                                          | fold change | ABI probeset ID | MGI gene ID |
|--------------------------|-------------|------------------------------------------------------|-------------|-----------------|-------------|
| immune response (33, 34) | Csf2        | colony stimulating factor 2 (granulocyte-macrophage) | -3.0        | 10385912        | 1339752     |
|                          | Il1r1       | interleukin 1 receptor-like 1                        | -2.0        | 10345791        | 98427       |
| metabolic process (33)   | Dusp2       | dual specificity phosphatase 2                       | -1.8        | 10475782        | 101911      |
|                          | Gfod1       | glucose-fructose oxidoreductase domain containing 1  | -1.8        | 10408879        | 2145304     |
|                          | Phlda1      | pleckstrin homology-like domain, family A, member 1  | -1.8        | 10366346        | 1096880     |

<sup>a</sup> Genes down-regulated more than 1.8-fold ( $p \leq 0.01$ ) at 6 h in BH-treated RAW 264.7 cells that are associated with specific overrepresented biological processes in malaria models (references listed with ontology in column 1) are shown in the table. Fold changes (FC) represent the average of three independent biological experiments.

Supporting Information Table 7. Selected Genes Down-Regulated by 0.1 mg/mL BH at 24 h<sup>a</sup>

|                                                 | gene symbol | description                                                                                       | fold change | ABI probeset ID | MGI gene ID |
|-------------------------------------------------|-------------|---------------------------------------------------------------------------------------------------|-------------|-----------------|-------------|
| cell cycle (33)                                 | Hectd3      | HECT domain containing 3                                                                          | -70.8       | 567598          | 1923858     |
|                                                 | Smarcb1     | SWI/SNF related, matrix associated, actin dependent regulator of chromatin, subfamily b, member 1 | -3.0        | 889629          | 1328366     |
|                                                 | Mre11a      | meiotic recombination 11 homolog A ( <i>S. cerevisiae</i> )                                       | -2.6        | 553944          | 1100512     |
|                                                 | Smc4l1      | SMC4 structural maintenance of chromosomes 4-like 1 (yeast)                                       | -2.1        | 789567          | 1917349     |
|                                                 | Camk2g      | calcium/calmodulin-dependent protein kinase II $\gamma$                                           | -2.0        | 390021          | 88259       |
|                                                 | Camk2b      | calcium/calmodulin-dependent protein kinase II, $\beta$                                           | -1.9        | 868597          | 88257       |
| cell-cell signaling (34)                        | Rab3a       | RAB3A, member RAS oncogene family                                                                 | -2.1        | 914789          | 97843       |
| metabolic process (33)                          | Alas2       | aminolevulinic acid synthase 2, erythroid                                                         | -9.3        | 880116          | 87990       |
|                                                 | Rpap1       | RNA polymerase II associated protein 1                                                            | -7.8        | 587339          | 1916175     |
|                                                 | Pdgfb       | platelet derived growth factor, B polypeptide                                                     | -6.0        | 788848          | 97528       |
| regulation of apoptosis (34)                    | Pomt1       | protein-O-mannosyltransferase 1                                                                   | -3.4        | 914042          | 2138994     |
|                                                 | Tnfsf13b    | tumor necrosis factor (ligand) superfamily, member 13b                                            | -4.7        | 386868          | 1344376     |
| regulation of transcription, DNA-dependent (34) | Bok         | Bcl-2-related ovarian killer protein                                                              | -4.3        | 364104          | 1858494     |
|                                                 | Setdb1      | SET domain, bifurcated 1                                                                          | -47.8       | 751594          | 1934229     |
|                                                 | Fos         | FBJ osteosarcoma oncogene                                                                         | -3.6        | 463565          | 95574       |
|                                                 | Esrra       | estrogen related receptor, $\alpha$                                                               | -2.6        | 923547          | 1346831     |

|                                                              |         |                                                                                       |       |        |         |
|--------------------------------------------------------------|---------|---------------------------------------------------------------------------------------|-------|--------|---------|
|                                                              | Yeats2  | YEATS domain containing 2                                                             | -2.0  | 654721 | 2447762 |
|                                                              | Asxl2   | additional sex combs like 2<br>(Drosophila)                                           | -1.9  | 540321 | 1922552 |
| signal transduction<br>(33)                                  | Wfikkn2 | WAP, follistatin/kazal,<br>immunoglobulin, kunitz and netrin<br>domain containing 2   | -24.5 | 419373 | 2669209 |
|                                                              | Olf112  | olfactory receptor 112                                                                | -6.1  | 690941 | 2177495 |
|                                                              | Cdgap   | Cdc42 GTPase-activating protein                                                       | -4.7  | 827470 | 1333857 |
|                                                              | Ms4a6b  | membrane-spanning 4-domains,<br>subfamily A, member 6B                                | -3.5  | 920843 | 1917024 |
|                                                              | Dner    | delta/notch-like EGF-related<br>receptor                                              | -2.9  | 618695 | 2152889 |
|                                                              | Frag1   | FGF receptor activating protein 1                                                     | -1.9  | 431551 | 2385286 |
| translation (33, 34)                                         | Irf3    | interferon regulatory factor 3                                                        | -1.8  | 925384 | 1859179 |
|                                                              | Eif2s3x | eukaryotic translation initiation<br>factor 2, subunit 3, structural gene<br>X-linked | -4.1  | 772876 | 1349431 |
|                                                              | Pars2   | prolyl-tRNA synthetase<br>(mitochondrial)(putative)                                   | -1.9  | 606179 | 2386296 |
| ubiquitin-<br>dependent protein<br>catabolic process<br>(33) | Pja2    | praja 2, RING-H2 motif containing                                                     | -50.5 | 656636 | 2159342 |
|                                                              | Ube2r2  | ubiquitin-conjugating enzyme E2R 2                                                    | -2.6  | 546015 | 1914865 |

<sup>a</sup> Genes down-regulated more than 1.8-fold ( $p \leq 0.01$ ) at 6 h in HNE-treated RAW 264.7 cells that are associated with specific overrepresented biological processes in malaria models (references listed with ontology in column 1) are shown in the table. Fold changes (FC) represent the average of three independent biological experiments.

#### Supporting Information Table 8. Selected Genes Up-Regulated by 0.1 mg/mL BH at 24 h<sup>a</sup>

|                        | gene symbol | description                                                                    | fold change | ABI probeset ID | MGI gene ID | ref |
|------------------------|-------------|--------------------------------------------------------------------------------|-------------|-----------------|-------------|-----|
| cell cycle (33)        | Ereg        | epiregulin                                                                     | 12.8        | 593765          | 107508      |     |
|                        | Cops5       | COP9 (constitutive photomorphogenic) homolog, subunit 5 (Arabidopsis thaliana) | 1.9         | 330594          | 1349415     |     |
| metabolic process (33) | Pcsk2       | proprotein convertase subtilisin/kexin type 2                                  | 7.4         | 732125          | 97512       |     |
|                        | Ppie        | peptidylprolyl isomerase E (cyclophilin E)                                     | 3.6         | 530121          | 1917118     |     |
|                        | Stard4      | StAR-related lipid transfer (START) domain containing 4                        | 3.1         | 551930          | 2156764     |     |
|                        | Blvra       | biliverdin reductase A                                                         | 2.2         | 664457          | 88170       |     |



|                                                       |          |                                                                          |      |        |         |          |
|-------------------------------------------------------|----------|--------------------------------------------------------------------------|------|--------|---------|----------|
|                                                       | Dusp14   | dual specificity phosphatase 14                                          | 2.1  | 928759 | 1927168 |          |
| immune response<br>(33, 34)                           | Il1a     | interleukin 1 $\alpha$                                                   | 6.0  | 595893 | 96542   |          |
|                                                       | Ccl6     | chemokine (C-C motif) ligand 6                                           | 5.3  | 928327 | 98263   |          |
|                                                       | Tollip   | toll interacting protein                                                 | 2.5  | 858428 | 1891808 |          |
|                                                       | Il20     | interleukin 20                                                           | 2.4  | 879278 | 1890473 |          |
|                                                       | H2-T23   | histocompatibility 2, T region locus 23                                  | 2.2  | 558496 | 95957   |          |
| intracellular protein transport<br>(34)               | Srp9     | signal recognition particle 9                                            | 2.1  | 927925 | 1350930 |          |
| metabolic process                                     | Gpt1     | glutamic pyruvic transaminase 1, soluble                                 | 2.6  | 556768 | 95802   |          |
| regulation of transcription,<br>DNA-dependent<br>(34) | Irf4     | interferon regulatory factor 4                                           | 4.6  | 386166 | 1096873 |          |
|                                                       | Taf7     | TAF7 RNA polymerase II, TATA box binding protein (TBP)-associated factor | 3.4  | 535868 | 1346348 |          |
|                                                       | Rnpc2    | RNA-binding region (RNP1, RRM) containing 2                              | 3.0  | 528719 | 2157953 |          |
|                                                       | Rqcd1    | rcd1 (required for cell differentiation) homolog 1 (S. pombe)            | 1.8  | 686770 | 1928902 |          |
| signal transduction<br>(33)                           | Rab33a   | RAB33A, member of RAS oncogene family                                    | 2.8  | 732409 | 109493  |          |
|                                                       | Olfir313 | olfactory receptor 313                                                   | 2.2  | 721885 | 3030147 |          |
|                                                       | Gipc1    | GIPC PDZ domain containing family, member 1                              | 2.1  | 794773 | 1926252 |          |
|                                                       | Rheb11   | Ras homolog enriched in brain like 1                                     | 1.9  | 456283 | 1916409 |          |
| ubiquitin-dependent protein catabolic process<br>(33) | Rbx1     | ring-box 1                                                               | 3.2  | 494826 | 1891829 |          |
|                                                       | Asb1     | ankyrin repeat and SOCS box-containing protein 1                         | 2.1  | 569408 | 1929735 |          |
|                                                       | Ube2l3   | ubiquitin-conjugating enzyme E2L 3                                       | 2.0  | 336987 | 109240  |          |
| other                                                 | Cd2      | CD2 antigen                                                              | 95.7 | 919536 | 88320   | (31, 33) |
|                                                       | Pstpip2  | proline-serine-threonine phosphatase-interacting protein 2               | 6.1  | 725778 | 1335088 | (30)     |

<sup>a</sup> Genes up-regulated more than 1.8-fold ( $p \leq 0.01$ ) at 6 h in HNE-treated RAW 264.7 cells that are associated with (1) specific genes or gene products correlated to malarial infection or HNE exposure (references listed by gene in column 7), or (2) specific overrepresented biological processes in malaria models (references listed with ontology in column 1) are shown in the table. Fold changes (FC) represent the average of three independent biological experiments.

Supporting Information Table 9. Common Genes Differentially Regulated by 0.1 mg/mL BH and 35  $\mu$ M HNE<sup>a</sup>

| gene symbol   | description                                               | probe ID | time (h) | fold change |       | MGI gene ID |
|---------------|-----------------------------------------------------------|----------|----------|-------------|-------|-------------|
|               |                                                           |          |          | BH          | HNE   |             |
| Il1r1l        | interleukin 1 receptor-like 1                             | 10345791 | 6        | -2.0        | -4.0  | 98427       |
| Phlda1        | pleckstrin homology-like domain, family A, member 1       | 10366346 | 6        | -1.8        | -2.6  | 1096880     |
| Csf2          | colony stimulating factor 2 (granulocyte-macrophage)      | 10385912 | 6        | -3.0        | -14.0 | 1339752     |
| Cd80          | CD80 antigen                                              | 10435712 | 6        | -1.8        | -2.5  | 101775      |
| Trem1         | triggering receptor expressed on myeloid cells 1          | 10445746 | 6        | -2.4        | 4.5   | 1930005     |
| Dusp2         | dual specificity phosphatase 2                            | 10475782 | 6        | -1.8        | -2.0  | 101911      |
| Plekhm1       | pleckstrin homology domain containing, family M (with RU  | 10391918 | 6        | 1.8         | 3.0   | 2443207     |
| Serpinh9b     | serine (or cysteine) peptidase inhibitor, clade B, mem    | 10404439 | 6        | 2.2         | 2.8   | 894668      |
| Plk2          | polo-like kinase 2 (Drosophila)                           | 10407126 | 6        | 2.2         | 3.7   | 1099790     |
| Il7r          | interleukin 7 receptor                                    | 10427628 | 6        | 2.6         | 3.1   | 96562       |
| Abcc5         | ATP-binding cassette, sub-family C (CFTR                  | 10438478 | 6        | 2.3         | 3.0   | 1351644     |
| Plekh01       | pleckstrin homology domain containing, family O member 1  | 10500295 | 6        | 1.9         | 2.3   | 1914470     |
| BC004044      | cDNA sequence BC004044                                    | 10526853 | 6        | 1.9         | 3.6   | 2136853     |
| Plxna1        | plexin A1                                                 | 10546184 | 6        | 1.9         | 2.4   | 107685      |
| Mtmr10        | myotubularin related protein 10                           | 10553897 | 6        | 1.8         | 2.1   | 2142292     |
| Hmox1         | heme oxygenase (decycling) 1                              | 10572897 | 6        | 2.5         | 6.3   | 96163       |
| Slc6a8        | solute carrier family 6 (neurotransmitter transporter, cr | 10600210 | 6        | 2.0         | 2.6   | 2147834     |
| Centa2        | centaurin, $\alpha$ 2                                     | 638602   | 24       | -2.6        | -3.9  | 2663075     |
| Ms4a6b        | membrane-spanning 4-domains, subfamily A, member 6B       | 920843   | 24       | -3.5        | -4.0  | 1917024     |
| Olf112        | olfactory receptor 112                                    | 690941   | 24       | -6.1        | -2.4  | 2177495     |
| Pdxk          | pyridoxal (pyridoxine, vitamin B6) kinase                 | 480631   | 24       | -2.7        | -2.7  | 1351869     |
| Tmem26        | transmembrane protein 26                                  | 604942   | 24       | -12.3       | -2.6  | 2143537     |
| 8030453O22Rik | RIKEN cDNA 8030453O22 gene                                | 769847   | 24       | 2.0         | 2.0   | 1924459     |
| Blvra         | biliverdin reductase A                                    | 664457   | 24       | 2.2         | 1.8   | 88170       |
| Ephx1         | epoxide hydrolase 1, microsomal                           | 907012   | 24       | 3.6         | 3.2   | 95405       |
| Hmgb1         | high mobility group box 1                                 | 900889   | 24       | 2.1         | 2.7   | 96113       |
| Metap11       | methionine aminopeptidase-like 1                          | 536468   | 24       | 2.8         | 1.9   | 1913809     |
| Phb           | prohibitin                                                | 392862   | 24       | 2.2         | 2.5   | 97572       |
| Tuba4         | tubulin, $\alpha$ 4                                       | 509694   | 24       | 1.9         | 2.5   | 1095410     |

<sup>a</sup> Genes consistently regulated 1.8-fold up or down ( $p \leq 0.01$ ) at 6 or 24 h in BH- and HNE-treated RAW 264.7 cells. Fold changes (FC) represent the average of three independent biological experiments.
